# Supplementary material for: Photocatalysis and adsorption kinetics of azo dyes by nanoparticles of nickel oxide and copper oxide and their nanocomposite in an aqueous medium
Source: PeerJ. 2022 Nov 14;10:e14358. doi: 10.7717/peerj.14358 (PMC9671035; doi:10.7717/peerj.14358)
Supplement: Supplemental Information 1 [file peerj-10-14358-s001.xlsx]

## Sheet: Figure 1
Figure 1
NiO-NPs
						Length
2	2141.57	156.616	131.519	170.333	-40.601	105.762
3	2817.85	140.708	99.549	195.049	-102.265	109.887
4	4395.85	170.631	135.047	211.722	-45	125.385
5	2479.71	155.43	126.367	189	35.218	220.919
6	1690.71	143.933	111	180.286	-94.086	149.012
7	1239.86	131.145	111	157.8	-78.69	108.269
						136.539
CuO
1	455.255	148.426	96.046	214.121	13.134	165.623
2	346.861	137.464	97.351	174	-129.806	125.972
3	173.43	132.346	110	176.427	-52.125	61.3
4	252.919	133.703	82	195.17	17.354	90.124
5	440.802	148.261	114.14	188	-21.448	161.738
6	368.54	172.884	134.96	250	-126.87	134.409
						123.194
NiO/CuO
1	199.256	80.211	65.6	97.899	-65.225	73.799
2	185.972	79.507	68.222	88.704	-48.013	69.345
3	166.047	79.033	54.5	102.5	-85.236	62.067
4	152.763	68.18	48.091	80.909	-33.69	55.753
5	152.763	75.609	53	97	-90	56.698
6	166.047	80.123	59	96.083	-94.764	62.067
7	192.614	117.768	97.286	136.429	-30.256	71.607
8	265.675	106.803	81	132.225	158.749	99.547
9	272.317	70.85	48	95.2	-2.862	103.216
						72.6777

## Sheet: Figure 2
Figure 2
CuO			NiO			NiO/CuO				Debye –Scherer’s formula
20	40		20.0001	42		20	42					D=Kλ/(β cos θ)						D=Kλ/(β cos θ)
20.1	58		20.0204	26		20.1	26											k= 0.94
20.2	64		20.0407	35		20.2	35					2theta	FWHM		Crysatlline size (nm)	Average crytalite size (nm)		λ= 0.15406
20.3	59		20.0611	30		20.3	30
20.4	60		20.0814	35		20.4	35
20.5	60		20.1017	33		20.5	33			CuO	32.5	32.646	0.65953		13.1091
20.6	45		20.122	26		20.6	26					35.0993	0.78684		11.06
20.7	58		20.1424	27		20.7	27					38.5034	0.72815		12.0701	13.8611
20.8	60		20.1627	38		20.8	38					48.6032	0.57545		15.8208
20.9	50		20.183	29		20.9	29					53.6237	0.62846		14.7931
21	55		20.2033	37		21	37					58.7159	0.55029		17.2999
21.1	65		20.2236	36		21.1	36					60.7059	0.74683		12.8749
21.2	76		20.244	26		21.2	26			composite
21.3	64		20.2643	23		21.3	23
21.4	67		20.2846	28		21.4	28					32.5866	0.7549		11.4513
21.5	64		20.3049	29		21.5	29					34.4502	0.78971		11.0002
21.6	52		20.3252	34		21.6	34					37.4964	0.60796		14.4126	12.897
21.7	75		20.3456	29		21.7	29					42.6687	0.65649		13.5688
21.8	69		20.3659	28		21.8	28					44.7274	0.99217		9.043
21.9	65		20.3862	35		21.9	35					48.1802	0.70201		12.9471
22	60		20.4065	24		22	24					53.4972	0.57907		16.0458
22.1	66		20.4269	34		22.1	34					54.6272	0.66453		14.0528
22.2	71		20.4472	40		22.2	40					62.3374	0.71561		13.5509
22.3	58		20.4675	37		22.3	37
22.4	45		20.4878	37		22.4	37			NiO
22.5	49		20.5081	25		22.5	25					31.7856	0.25108		34.3601
22.6	56		20.5284	33		22.6	33					34.4416	0.24355		35.6674
22.7	68		20.5488	19		22.7	19					36.2704	0.28269		30.8857	30.5023
22.8	67		20.5691	35		22.8	35					47.5671	0.35949		25.223
22.9	57		20.5894	34		22.9	34					56.6298	0.35734		26.3755
23	74		20.6097	31		23	31
23.1	60		20.6301	34		23.1	34
23.2	50		20.6504	29		23.2	29
23.3	48		20.6707	36		23.3	36
23.4	72		20.691	36		23.4	36
23.5	38		20.7113	30		23.5	30
23.6	64		20.7317	22		23.6	22
23.7	64		20.752	35		23.7	35
23.8	64		20.7723	35		23.8	35
23.9	67		20.7926	35		23.9	35
23.95	67		20.813	32		23.95	32
24	54		20.8333	26		24	26
24.1	55		20.8536	25		24.1	25
24.2	45		20.8739	36		24.2	36
24.3	64		20.8942	24		24.3	24
24.4	72		20.9145	25		24.4	25
24.5	61		20.9349	24		24.5	24
24.6	62		20.9552	21		24.6	21
24.7	57		20.9755	27		24.7	27
24.8	68		20.9958	36		24.8	36
24.9	65		21.0162	26		24.9	26
25	54		21.0365	36		25	36
25.1	65		21.0568	32		25.1	32
25.2	65		21.0771	29		25.2	29
25.3	50		21.0974	33		25.3	33
25.4	64		21.1178	29		25.4	29
25.5	51		21.1381	24		25.5	24
25.6	51		21.1584	35		25.6	35
25.7	50		21.1787	32		25.7	32
25.8	68		21.199	32		25.8	32
25.9	62		21.2194	39		25.9	39
26	48		21.2397	34		26	34
26.1	62		21.26	28		26.1	28
26.2	44		21.2803	38		26.2	38
26.3	53		21.3007	31		26.3	31
26.4	57		21.321	40		26.4	40
26.5	58		21.3413	30		26.5	30
26.6	72		21.3616	26		26.6	26
26.7	59		21.3819	17		26.7	17
26.8	66		21.4023	40		26.8	40
26.9	75		21.4226	31		26.9	31
27	76		21.4429	36		27	36
27.1	52		21.4632	24		27.1	24
27.2	76		21.4836	25		27.2	25
27.3	76		21.5039	20		27.3	20
27.4	48		21.5242	27		27.4	27
27.5	60		21.5445	34		27.5	34
27.6	51		21.5648	28		27.6	28
27.7	65		21.5851	28		27.7	28
27.8	57		21.6055	25		27.8	25
27.9	60		21.6258	26		27.9	26
28	70		21.6461	40		28	40
28.1	64		21.6664	28		28.1	28
28.2	65		21.6868	35		28.2	35
28.3	61		21.7071	27		28.3	27
28.4	61		21.7274	29		28.4	29
28.5	62		21.7477	34		28.5	34
28.6	62		21.768	28		28.6	28
28.7	48		21.7884	33		28.7	28
28.8	66		21.8087	33		28.8	25
28.9	76		21.829	30		28.9	26
29	64		21.8493	18		29	40
29.1	62		21.8697	20		29.1	28
29.2	51		21.89	23		29.2	35
29.3	64		21.9103	24		29.3	27
29.4	60		21.9306	25		29.4	29
29.5	67		21.9509	26		29.5	34
29.6	66		21.9713	27		29.6	28
29.7	61		21.9916	37		29.7	28
29.8	77		22.0119	24		29.8	25
29.9	67		22.0322	38		29.9	26
30	66		22.0525	32		30	40
30.1	70		22.0729	32		30.1	28
30.2	46		22.0932	20		30.2	35
30.3	59		22.1135	26		30.3	27
30.4	57		22.1338	23		30.4	29
30.5	67		22.1542	27		30.5	34
30.6	64		22.1745	22		30.6	48
30.7	60		22.1948	31		30.7	43
30.8	60		22.2151	31		30.8	42
30.9	62		22.2354	29		30.9	35
31	48		22.2557	27		31	48
31.1	61		22.2761	32		31.1	50
31.2	57		22.2964	33		31.2	46
31.3	67		22.3167	28		31.3	47
31.5	51		22.337	26		31.5	43
31.7	62		22.3574	25		31.7	42
31.9	60		22.3777	23		31.9	41
32.1	64		22.398	27		32.1	73
32.2	75		22.4183	25		32.2	89
32.3	80		22.4386	22		32.3	97
32.4	85		22.459	24		32.4	138
32.5	90		22.4793	23		32.5	144
32.6	100		22.4996	33		32.6	158
32.7	100		22.5199	21		32.7	132
32.8	90		22.5403	26		32.8	112
32.9	85		22.5606	27		32.9	95
33	80		22.5809	21		33	89
33.1	75		22.6012	26		33.1	73
33.2	58		22.6215	29		33.2	65
33.3	64		22.6419	25		33.3	60
33.4	59		22.6622	29		33.4	43
33.5	70		22.6825	25		33.5	42
33.6	70		22.7028	27		33.6	35
33.7	74		22.7231	28		33.7	44
33.8	58		22.7435	31		33.8	42
33.9	60		22.7638	26		33.9	65
34	50		22.7841	31		34	75
34.1	55		22.8044	23		34.1	80
34.2	45		22.8248	32		34.2	90
34.3	59		22.8451	21		34.3	100
34.4	66		22.8654	25		34.4	110
34.5	75		22.8857	28		34.5	109
34.6	150		22.906	34		34.6	114
34.7	170		22.9263	28		34.7	96
34.8	190		22.9467	32		34.8	74
34.9	210		22.967	22		34.9	62
35	230		22.9873	29		35	60
35.1	250		23.0076	20		35.1	55
35.2	230		23.028	20		35.2	46
35.3	210		23.0483	29		35.3	39
35.4	190		23.0686	31		35.4	32
35.5	170		23.0889	28		35.5	37
35.6	150		23.1092	25		35.6	35
35.7	74		23.1296	30		35.7	38
35.8	58		23.1499	34		35.8	30
35.9	60		23.1702	29		35.9	32
36	50		23.1905	37		36	31
36.1	55		23.2109	41		36.1	28
36.2	78		23.2312	24		36.2	25
36.3	75		23.2515	27		36.3	27
36.4	74		23.2718	29		36.4	28
36.5	58		23.2921	26		36.5	25
36.6	60		23.3125	29		36.6	28
36.7	65		23.3328	25		36.7	30
36.8	55		23.3531	23		36.8	31
36.9	59		23.3734	20		36.9	25
37	66		23.3937	28		37	64
37.1	75		23.4141	19		37.1	92
37.2	76		23.4344	29		37.2	89
37.3	52		23.4547	34		37.3	119
37.4	76		23.475	32		37.4	170
37.5	76		23.4953	21		37.5	169
37.6	48		23.5157	16		37.6	143
37.7	55		23.536	24		37.7	128
37.8	51		23.5563	18		37.8	81
37.9	85		23.5766	20		37.9	84
38	100		23.5969	28		38	65
38.1	130		23.6173	19		38.1	63
38.2	150		23.6376	16		38.2	60
38.3	170		23.6579	23		38.3	55
38.4	190		23.6782	27		38.4	45
38.5	210		23.6986	27		38.5	43
38.6	190		23.7189	27		38.6	40
38.7	170		23.7392	18		38.7	39
38.8	150		23.7595	27		38.8	35
38.9	130		23.7798	28		38.9	43
39	100		23.8002	25		39	44
39.1	85		23.8205	29		39.1	40
39.2	74		23.8408	19		39.2	41
39.3	58		23.8611	30		39.3	42
39.4	60		23.8815	26		39.4	38
39.5	50		23.9018	27		39.5	39
39.6	55		23.9221	35		39.6	38
39.7	65		23.9424	19		39.7	45
39.8	76		23.9627	29		39.8	43
39.9	64		23.9831	24		39.9	45
40	67		24.0034	22		40	44
40.1	64		24.0237	36		40.1	42
40.2	52		24.044	15		40.2	43
40.3	75		24.0643	22		40.3	42
40.4	69		24.0847	30		40.4	35
40.5	65		24.105	21		40.5	44
40.6	60		24.1253	25		40.6	42
40.7	66		24.1456	23		40.7	49
40.8	71		24.1659	34		40.8	43
40.9	58		24.1863	27		40.9	42
41	45		24.2066	19		41	35
41.1	49		24.2269	28		41.1	44
41.2	56		24.2472	29		41.2	42
41.3	68		24.2675	22		41.3	49
41.4	67		24.2879	20		41.4	37
41.5	57		24.3082	15		41.5	43
41.6	74		24.3285	26		41.6	39
41.7	60		24.3488	28		41.7	42
41.8	50		24.3692	29		41.8	41
41.9	48		24.3895	21		41.9	40
42	72		24.4098	15		42	48
42.1	38		24.4301	24		42.1	43
42.2	64		24.4504	18		42.2	42
42.3	64		24.4708	25		42.3	74
42.4	64		24.4911	27		42.4	80
42.5	67		24.5114	28		42.5	95
42.6	67		24.5317	26		42.6	110
42.7	54		24.5521	22		42.7	100
42.8	55		24.5724	21		42.8	95
42.9	45		24.5927	22		42.9	85
43	64		24.613	21		43	75
43.1	72		24.6333	24		43.1	65
43.2	61		24.6537	15		43.2	43
43.3	62		24.674	30		43.3	42
43.4	57		24.6943	19		43.4	39
43.5	68		24.7146	37		43.5	50
43.6	64		24.7349	23		43.6	46
43.7	52		24.7553	27		43.7	47
43.8	75		24.7756	24		43.8	43
43.9	69		24.7959	26		43.9	42
44	65		24.8162	18		44	41
44.1	60		24.8365	17		44.1	40
44.2	66		24.8569	22		44.2	50
44.3	60		24.8772	23		44.3	55
44.4	58		24.8975	27		44.4	60
44.5	45		24.9178	22		44.5	65
44.6	49		24.9382	22		44.6	70
44.7	56		24.9585	29		44.7	75
44.8	68		24.9788	24		44.8	72
44.9	67		24.9991	24		44.9	65
45	57		25.0194	19		45	55
45.1	74		25.0398	32		45.1	55
45.2	60		25.0601	19		45.2	50
45.3	50		25.0804	21		45.3	45
45.4	72		25.1007	22		45.4	40
45.5	38		25.121	25		45.5	55
45.6	68		25.1414	19		45.6	54
45.7	67		25.1617	22		45.7	55
45.8	57		25.182	27		45.8	45
45.9	74		25.2023	24		45.9	45
46	60		25.2227	17		46	38
46.1	50		25.243	22		46.1	40
46.2	48		25.2633	19		46.2	39
46.3	72		25.2836	18		46.3	35
46.4	40		25.3039	26		46.4	36
46.5	45		25.3243	30		46.5	33
46.6	50		25.3446	21		46.6	43
46.7	55		25.3649	17		46.7	42
46.8	60		25.3852	18		46.8	39
46.9	69		25.4055	15		46.9	40
47	65		25.4259	28		47	41
47.1	60		25.4462	17		47.1	42
47.2	66		25.4665	25		47.2	43
47.3	40		25.4868	24		47.3	40
47.4	58		25.5071	21		47.4	40
47.5	45		25.5275	24		47.5	44
47.6	49		25.5478	26		47.6	45
47.7	56		25.5681	26		47.7	50
47.8	68		25.5884	20		47.8	56
47.9	67		25.6088	31		47.9	68
48	57		25.6291	25		48	70
48.1	59		25.6494	18		48.1	79
48.2	80		25.6697	20		48.2	85
48.3	90		25.69	22		48.3	77
48.4	100		25.7104	21		48.4	70
48.5	110		25.7307	24		48.5	65
48.6	120		25.751	15		48.6	50
48.7	110		25.7713	17		48.7	46
48.8	100		25.7916	26		48.8	45
48.9	90		25.812	29		48.9	43
49	80		25.8323	26		49	40
49.1	65		25.8526	26		49.1	41
49.2	60		25.8729	29		49.2	40
49.3	60		25.8932	26		49.3	41
49.4	66		25.9136	22		49.4	42
49.5	71		25.9339	16		49.5	55
49.6	58		25.9542	19		49.6	50
49.7	55		25.9745	29		49.7	45
49.8	59		25.9949	20		49.8	50
49.9	56		26.0152	18		49.9	46
50	68		26.0355	20		50	47
50.1	67		26.0558	27		50.1	43
50.2	57		26.0761	29		50.2	42
50.3	74		26.0965	33		50.3	41
50.4	60		26.1168	24		50.4	40
50.5	50		26.1371	20		50.5	48
50.6	48		26.1574	18		50.6	43
50.7	72		26.1777	26		50.7	42
50.8	65		26.1981	21		50.8	39
50.9	55		26.2184	20		50.9	50
51	50		26.2387	16		51	46
51.1	65		26.259	22		51.1	47
51.2	60		26.2794	28		51.2	43
51.3	69		26.2997	21		51.3	42
51.4	65		26.32	19		51.4	41
51.5	60		26.3403	23		51.5	40
51.6	66		26.3606	16		51.6	48
51.7	71		26.381	21		51.7	43
51.8	58		26.4013	27		51.8	42
51.9	60		26.4216	26		51.9	39
52	65		26.4419	25		52	39
52.1	56		26.4622	26		52.1	42
52.2	68		26.4826	22		52.2	43
52.3	67		26.5029	22		52.3	48
52.4	57		26.5232	20		52.4	50
52.5	74		26.5435	26		52.5	46
52.6	60		26.5638	25		52.6	47
52.7	50		26.5842	30		52.7	43
52.8	60		26.6045	22		52.8	42
52.9	58		26.6248	19		52.9	41
53	64		26.6451	21		53	40
53.1	59		26.6655	11		53.1	45
53.2	70		26.6858	14		53.2	50
53.3	75		26.7061	22		53.3	55
53.4	80		26.7264	19		53.4	60
53.5	85		26.7467	21		53.5	65
53.6	90		26.7671	22		53.6	60
53.7	85		26.7874	20		53.7	55
53.8	80		26.8077	15		53.8	50
53.9	75		26.828	17		53.9	45
54	76		26.8483	21		54	45
54.1	64		26.8687	25		54.1	46
54.2	67		26.889	16		54.2	50
54.3	64		26.9093	22		54.3	55
54.4	52		26.9296	18		54.4	60
54.5	75		26.95	19		54.5	65
54.6	69		26.9703	24		54.6	75
54.7	65		26.9906	16		54.7	68
54.8	60		27.0109	13		54.8	65
54.9	66		27.0312	20		54.9	60
55	71		27.0516	15		55	50
55.1	58		27.0719	28		55.1	45
55.2	60		27.0922	15		55.2	43
55.3	65		27.1125	17		55.3	40
55.4	56		27.1328	32		55.4	41
55.5	68		27.1532	22		55.5	42
55.6	67		27.1735	21		55.6	43
55.7	65		27.1938	23		55.7	47
55.8	58		27.2141	14		55.8	46
55.9	64		27.2344	18		55.9	50
56	59		27.2548	20		56	48
56.1	78		27.2751	21		56.1	43
56.15	75		27.2954	16		56.15	42
56.2	74		27.3157	29		56.2	39
56.25	58		27.3361	16		56.25	40
56.3	60		27.3564	18		56.3	41
56.35	50		27.3767	25		56.35	42
56.4	55		27.397	17		56.4	43
56.45	81		27.4173	19		56.45	47
56.5	76		27.4377	18		56.5	46
56.55	64		27.458	18		56.55	50
56.6	67		27.4783	15		56.6	48
56.7	64		27.4986	21		56.7	43
56.8	52		27.519	17		56.8	42
56.9	75		27.5393	22		56.9	39
57	69		27.5596	14		57	50
57.1	65		27.5799	18		57.1	46
57.2	60		27.6002	15		57.2	47
57.3	66		27.6206	17		57.3	43
57.4	71		27.6409	24		57.4	42
57.5	58		27.6612	17		57.5	41
57.6	45		27.6815	21		57.6	40
57.7	49		27.7018	20		57.7	48
57.8	56		27.7222	13		57.8	43
57.9	68		27.7425	18		57.9	42
58	67		27.7628	19		58	39
58.1	40		27.7831	12		58.1	40
58.2	58		27.8034	22		58.2	50
58.3	64		27.8238	22		58.3	38
58.4	80		27.8441	23		58.4	38
58.5	85		27.8644	11		58.5	34
58.6	90		27.8847	17		58.6	45
58.7	95		27.905	24		58.7	48
58.8	90		27.9254	11		58.8	55
58.9	85		27.9457	22		58.9	38
59	80		27.966	27		59	50
59.1	55		27.9863	16		59.1	42
59.2	81		28.0067	20		59.2	47
59.3	76		28.027	14		59.3	41
59.4	64		28.0473	18		59.4	52
59.5	67		28.0676	15		59.5	46
59.6	64		28.0879	21		59.6	51
59.7	52		28.1083	33		59.7	48
59.8	75		28.1286	18		59.8	55
59.9	69		28.1489	16		59.9	40
60	65		28.1692	24		60	48
60.1	60		28.1896	18		60.1	43
60.2	66		28.2099	23		60.2	42
60.3	80		28.2302	24		60.3	39
60.4	85		28.2505	22		60.4	39
60.5	90		28.2708	25		60.5	42
60.6	95		28.2911	19		60.6	43
60.7	100		28.3115	21		60.7	48
60.8	95		28.3318	26		60.8	50
60.9	90		28.3521	18		60.9	46
61	85		28.3724	17		61	47
61.1	80		28.3928	20		61.1	43
61.2	64		28.4131	20		61.2	42
61.3	59		28.4334	18		61.3	41
61.4	78		28.4537	14		61.4	40
61.5	75		28.474	18		61.5	39
61.6	74		28.4944	16		61.6	42
61.7	58		28.5147	18		61.7	43
61.8	60		28.535	24		61.8	48
61.9	50		28.5553	11		61.9	50
62	55		28.5756	18		62	46
62.1	81		28.596	14		62.1	47
62.2	90		28.6163	22		62.2	43
62.3	64		28.6366	18		62.3	42
62.4	67		28.6569	18		62.4	41
62.5	64		28.6773	21		62.5	40
62.6	52		28.6976	29		62.6	39
62.7	75		28.7179	22		62.7	42
62.8	69		28.7382	18		62.8	43
62.9	65		28.7585	20		62.9	48
63	60		28.7789	10		63	50
63.1	66		28.7992	23		63.1	46
63.2	71		28.8195	18		63.2	47
63.3	58		28.8398	30		63.3	43
63.4	45		28.8602	18		63.4	42
63.5	49		28.8805	17		63.5	41
63.6	56		28.9008	22		63.6	40
63.7	68		28.9211	19		63.7	48
63.8	67		28.9414	29		63.8	45
63.9	40		28.9617	14		63.9	40
64	58		28.9821	18		64	50
			29.0024	25
			29.0227	30
			29.043	22
			29.0634	23
			29.0837	24
			29.104	31
			29.1243	27
			29.1446	19
			29.165	27
			29.1853	23
			29.2056	15
			29.2259	21
			29.2462	20
			29.2666	12
			29.2869	17
			29.3072	14
			29.3275	25
			29.3479	11
			29.3682	14
			29.3885	12
			29.4088	27
			29.4291	12
			29.4495	20
			29.4698	12
			29.4901	27
			29.5104	12
			29.5308	21
			29.5511	29
			29.5714	14
			29.5917	12
			29.612	27
			29.6323	18
			29.6527	24
			29.673	26
			29.6933	17
			29.7136	14
			29.734	18
			29.7543	16
			29.7746	17
			29.7949	17
			29.8152	18
			29.8356	20
			29.8559	14
			29.8762	17
			29.8965	22
			29.9169	20
			29.9372	28
			29.9575	19
			29.9778	23
			29.9981	14
			30.0185	20
			30.0388	13
			30.0591	15
			30.0794	28
			30.0997	13
			30.1201	17
			30.1404	20
			30.1607	13
			30.181	19
			30.2014	17
			30.2217	11
			30.242	20
			30.2623	22
			30.2826	25
			30.3029	12
			30.3233	24
			30.3436	24
			30.3639	26
			30.3842	24
			30.4046	26
			30.4249	20
			30.4452	24
			30.4655	26
			30.4858	26
			30.5062	28
			30.5265	25
			30.5468	24
			30.5671	14
			30.5875	25
			30.6078	28
			30.6281	21
			30.6484	20
			30.6687	21
			30.6891	23
			30.7094	30
			30.7297	15
			30.75	30
			30.7703	21
			30.7907	27
			30.811	28
			30.8313	21
			30.8516	24
			30.8719	32
			30.8923	26
			30.9126	35
			30.9329	29
			30.9532	28
			30.9735	25
			30.9939	27
			31.0142	30
			31.0345	32
			31.0548	19
			31.0752	32
			31.0955	31
			31.1158	35
			31.1361	33
			31.1564	29
			31.1768	30
			31.1971	36
			31.2174	41
			31.2377	31
			31.2581	39
			31.2784	35
			31.2987	55
			31.319	48
			31.3393	46
			31.3597	48
			31.38	59
			31.4003	45
			31.4206	53
			31.4409	80
			31.4613	68
			31.4816	68
			31.5019	94
			31.5222	94
			31.5425	130
			31.5629	136
			31.5832	154
			31.6035	211
			31.6238	232
			31.6441	299
			31.6645	361
			31.6848	464
			31.7051	539
			31.7254	633
			31.7458	746
			31.7661	823
			31.7864	823
			31.8067	772
			31.827	670
			31.8474	605
			31.8677	539
			31.888	474
			31.9083	410
			31.9287	294
			31.949	246
			31.9693	193
			31.9896	136
			32.0099	135
			32.0303	113
			32.0506	99
			32.0709	77
			32.0912	70
			32.1115	70
			32.1319	70
			32.1522	72
			32.1725	46
			32.1928	45
			32.2131	45
			32.2335	33
			32.2538	40
			32.2741	47
			32.2944	50
			32.3147	44
			32.3351	39
			32.3554	34
			32.3757	40
			32.396	37
			32.4164	32
			32.4367	40
			32.457	33
			32.4773	34
			32.4976	23
			32.518	32
			32.5383	23
			32.5586	20
			32.5789	23
			32.5992	31
			32.6196	31
			32.6399	29
			32.6602	29
			32.6805	27
			32.7009	31
			32.7212	38
			32.7415	31
			32.7618	29
			32.7821	16
			32.8025	28
			32.8228	25
			32.8431	23
			32.8634	29
			32.8837	18
			32.9041	24
			32.9244	22
			32.9447	23
			32.965	26
			32.9853	26
			33.0057	19
			33.026	25
			33.0463	29
			33.0666	25
			33.087	21
			33.1073	25
			33.1276	16
			33.1479	27
			33.1682	24
			33.1886	34
			33.2089	24
			33.2292	17
			33.2495	25
			33.2698	36
			33.2902	26
			33.3105	29
			33.3308	28
			33.3511	18
			33.3715	24
			33.3918	35
			33.4121	23
			33.4324	23
			33.4527	23
			33.4731	39
			33.4934	17
			33.5137	33
			33.534	30
			33.5543	37
			33.5747	33
			33.595	28
			33.6153	28
			33.6356	36
			33.6559	34
			33.6763	33
			33.6966	30
			33.7169	30
			33.7372	19
			33.7576	35
			33.7779	42
			33.7982	41
			33.8185	38
			33.8388	36
			33.8592	39
			33.8795	35
			33.8998	35
			33.9201	35
			33.9404	44
			33.9608	39
			33.9811	49
			34.0014	41
			34.0217	47
			34.0421	42
			34.0624	54
			34.0827	58
			34.103	54
			34.1233	58
			34.1437	56
			34.164	67
			34.1843	78
			34.2046	110
			34.2249	112
			34.2453	129
			34.2656	154
			34.2859	178
			34.3062	231
			34.3265	275
			34.3469	358
			34.3672	431
			34.3875	462
			34.4078	571
			34.4282	606
			34.4485	568
			34.4688	616
			34.4891	489
			34.5094	417
			34.5298	420
			34.5501	278
			34.5704	245
			34.5907	220
			34.611	143
			34.6314	123
			34.6517	116
			34.672	103
			34.6923	90
			34.7127	96
			34.733	58
			34.7533	48
			34.7736	55
			34.7939	57
			34.8143	47
			34.8346	49
			34.8549	31
			34.8752	41
			34.8956	40
			34.9159	39
			34.9362	25
			34.9565	33
			34.9768	40
			34.9971	40
			35.0175	37
			35.0378	40
			35.0581	31
			35.0784	45
			35.0988	40
			35.1191	25
			35.1394	31
			35.1597	47
			35.18	44
			35.2004	32
			35.2207	36
			35.241	38
			35.2613	53
			35.2816	41
			35.302	38
			35.3223	51
			35.3426	20
			35.3629	36
			35.3833	37
			35.4036	45
			35.4239	43
			35.4442	44
			35.4645	38
			35.4849	33
			35.5052	55
			35.5255	50
			35.5458	50
			35.5662	42
			35.5865	44
			35.6068	49
			35.6271	36
			35.6474	39
			35.6677	50
			35.6881	56
			35.7084	55
			35.7287	48
			35.749	52
			35.7694	61
			35.7897	63
			35.81	51
			35.8303	63
			35.8506	73
			35.871	83
			35.8913	114
			35.9116	109
			35.9319	118
			35.9522	146
			35.9726	148
			35.9929	182
			36.0132	188
			36.0335	233
			36.0539	266
			36.0742	325
			36.0945	351
			36.1148	424
			36.1351	562
			36.1555	691
			36.1758	844
			36.1961	951
			36.2164	1092
			36.2368	1168
			36.2571	1192
			36.2774	1196
			36.2977	1150
			36.318	1076
			36.3383	978
			36.3587	909
			36.379	729
			36.3993	563
			36.4196	554
			36.44	400
			36.4603	324
			36.4806	283
			36.5009	203
			36.5212	197
			36.5416	154
			36.5619	143
			36.5822	132
			36.6025	139
			36.6228	112
			36.6432	112
			36.6635	82
			36.6838	71
			36.7041	75
			36.7245	61
			36.7448	64
			36.7651	47
			36.7854	57
			36.8057	35
			36.8261	55
			36.8464	46
			36.8667	43
			36.887	45
			36.9074	38
			36.9277	43
			36.948	50
			36.9683	41
			36.9886	46
			37.0089	28
			37.0293	36
			37.0496	31
			37.0699	31
			37.0902	33
			37.1106	28
			37.1309	25
			37.1512	35
			37.1715	29
			37.1918	28
			37.2122	28
			37.2325	28
			37.2528	26
			37.2731	25
			37.2934	31
			37.3138	25
			37.3341	25
			37.3544	20
			37.3747	13
			37.3951	18
			37.4154	31
			37.4357	16
			37.456	15
			37.4763	26
			37.4967	20
			37.517	23
			37.5373	28
			37.5576	18
			37.578	28
			37.5983	25
			37.6186	18
			37.6389	24
			37.6592	20
			37.6795	12
			37.6999	25
			37.7202	23
			37.7405	23
			37.7608	25
			37.7812	28
			37.8015	18
			37.8218	35
			37.8421	21
			37.8624	24
			37.8828	28
			37.9031	31
			37.9234	24
			37.9437	19
			37.9641	30
			37.9844	37
			38.0047	27
			38.025	20
			38.0453	20
			38.0657	22
			38.086	19
			38.1063	19
			38.1266	13
			38.1469	18
			38.1673	17
			38.1876	23
			38.2079	23
			38.2282	14
			38.2486	23
			38.2689	15
			38.2892	23
			38.3095	18
			38.3298	27
			38.3501	10
			38.3705	21
			38.3908	15
			38.4111	14
			38.4314	21
			38.4518	17
			38.4721	16
			38.4924	23
			38.5127	11
			38.533	22
			38.5534	14
			38.5737	23
			38.594	23
			38.6143	16
			38.6347	13
			38.655	21
			38.6753	21
			38.6956	20
			38.7159	15
			38.7363	26
			38.7566	26
			38.7769	16
			38.7972	18
			38.8175	15
			38.8379	26
			38.8582	18
			38.8785	14
			38.8988	23
			38.9192	18
			38.9395	19
			38.9598	24
			38.9801	24
			39.0004	16
			39.0207	18
			39.0411	15
			39.0614	27
			39.0817	13
			39.102	16
			39.1224	16
			39.1427	18
			39.163	13
			39.1833	19
			39.2036	11
			39.224	17
			39.2443	8
			39.2646	13
			39.2849	9
			39.3053	16
			39.3256	15
			39.3459	14
			39.3662	13
			39.3865	18
			39.4069	11
			39.4272	17
			39.4475	18
			39.4678	11
			39.4881	15
			39.5085	15
			39.5288	16
			39.5491	12
			39.5694	14
			39.5898	14
			39.6101	10
			39.6304	17
			39.6507	13
			39.671	19
			39.6913	17
			39.7117	13
			39.732	17
			39.7523	8
			39.7726	13
			39.793	12
			39.8133	18
			39.8336	17
			39.8539	15
			39.8742	18
			39.8946	21
			39.9149	25
			39.9352	24
			39.9555	17
			39.9759	27
			39.9962	19
			40.0165	13
			40.0368	20
			40.0571	20
			40.0775	15
			40.0978	15
			40.1181	25
			40.1384	18
			40.1587	12
			40.1791	20
			40.1994	22
			40.2197	20
			40.24	10
			40.2604	22
			40.2807	16
			40.301	15
			40.3213	11
			40.3416	18
			40.362	13
			40.3823	11
			40.4026	16
			40.4229	14
			40.4432	17
			40.4636	17
			40.4839	11
			40.5042	13
			40.5245	13
			40.5448	16
			40.5652	16
			40.5855	14
			40.6058	9
			40.6261	11
			40.6465	14
			40.6668	13
			40.6871	12
			40.7074	13
			40.7277	15
			40.7481	10
			40.7684	19
			40.7887	10
			40.809	8
			40.8293	11
			40.8497	10
			40.87	14
			40.8903	11
			40.9106	14
			40.931	18
			40.9513	17
			40.9716	12
			40.9919	13
			41.0122	13
			41.0326	13
			41.0529	15
			41.0732	8
			41.0935	19
			41.1138	12
			41.1342	18
			41.1545	13
			41.1748	14
			41.1951	11
			41.2154	7
			41.2358	9
			41.2561	8
			41.2764	12
			41.2967	17
			41.3171	18
			41.3374	14
			41.3577	13
			41.378	17
			41.3983	12
			41.4187	9
			41.439	16
			41.4593	14
			41.4796	9
			41.4999	11
			41.5203	17
			41.5406	11
			41.5609	10
			41.5812	11
			41.6016	11
			41.6219	19
			41.6422	14
			41.6625	13
			41.6828	9
			41.7032	6
			41.7235	8
			41.7438	6
			41.7641	11
			41.7844	9
			41.8048	16
			41.8251	11
			41.8454	17
			41.8657	10
			41.886	10
			41.9064	8
			41.9267	8
			41.947	13
			41.9673	15
			41.9877	10
			42.008	12
			42.0283	8
			42.0486	17
			42.0689	10
			42.0893	14
			42.1096	16
			42.1299	5
			42.1502	11
			42.1705	10
			42.1909	14
			42.2112	12
			42.2315	16
			42.2518	11
			42.2722	10
			42.2925	10
			42.3128	16
			42.3331	11
			42.3534	11
			42.3738	13
			42.3941	9
			42.4144	11
			42.4347	11
			42.455	7
			42.4754	15
			42.4957	9
			42.516	11
			42.5363	13
			42.5566	15
			42.577	19
			42.5973	16
			42.6176	10
			42.6379	18
			42.6583	11
			42.6786	12
			42.6989	11
			42.7192	10
			42.7395	13
			42.7599	10
			42.7802	15
			42.8005	11
			42.8208	8
			42.8411	14
			42.8615	4
			42.8818	12
			42.9021	7
			42.9224	8
			42.9427	7
			42.9631	11
			42.9834	13
			43.0037	12
			43.024	12
			43.0444	14
			43.0647	11
			43.085	14
			43.1053	9
			43.1256	15
			43.146	8
			43.1663	8
			43.1866	13
			43.2069	14
			43.2272	11
			43.2476	11
			43.2679	10
			43.2882	10
			43.3085	14
			43.3289	12
			43.3492	12
			43.3695	14
			43.3898	16
			43.4101	14
			43.4305	16
			43.4508	11
			43.4711	7
			43.4914	10
			43.5117	14
			43.5321	8
			43.5524	9
			43.5727	11
			43.593	13
			43.6133	9
			43.6337	18
			43.654	14
			43.6743	5
			43.6946	10
			43.715	14
			43.7353	8
			43.7556	13
			43.7759	8
			43.7962	10
			43.8166	17
			43.8369	9
			43.8572	17
			43.8775	13
			43.8978	9
			43.9182	10
			43.9385	15
			43.9588	10
			43.9791	22
			43.9995	26
			44.0198	9
			44.0401	22
			44.0604	8
			44.0807	9
			44.1011	17
			44.1214	6
			44.1417	15
			44.162	14
			44.1823	12
			44.2027	14
			44.223	8
			44.2433	15
			44.2636	8
			44.2839	16
			44.3043	6
			44.3246	17
			44.3449	22
			44.3652	9
			44.3856	13
			44.4059	14
			44.4262	18
			44.4465	10
			44.4668	9
			44.4872	16
			44.5075	9
			44.5278	12
			44.5481	15
			44.5684	13
			44.5888	16
			44.6091	17
			44.6294	25
			44.6497	22
			44.6701	19
			44.6904	13
			44.7107	18
			44.731	12
			44.7513	14
			44.7717	12
			44.792	18
			44.8123	14
			44.8326	9
			44.8529	11
			44.8733	18
			44.8936	10
			44.9139	11
			44.9342	12
			44.9545	7
			44.9749	8
			44.9952	10
			45.0155	10
			45.0358	12
			45.0562	19
			45.0765	10
			45.0968	11
			45.1171	8
			45.1374	8
			45.1578	14
			45.1781	9
			45.1984	5
			45.2187	8
			45.239	7
			45.2594	13
			45.2797	13
			45.3	13
			45.3203	12
			45.3406	9
			45.361	10
			45.3813	14
			45.4016	9
			45.4219	16
			45.4423	18
			45.4626	14
			45.4829	14
			45.5032	16
			45.5235	16
			45.5439	16
			45.5642	16
			45.5845	27
			45.6048	14
			45.6251	10
			45.6455	15
			45.6658	11
			45.6861	16
			45.7064	6
			45.7268	15
			45.7471	13
			45.7674	18
			45.7877	5
			45.808	14
			45.8284	12
			45.8487	8
			45.869	7
			45.8893	11
			45.9096	20
			45.93	6
			45.9503	8
			45.9706	13
			45.9909	10
			46.0112	16
			46.0316	12
			46.0519	6
			46.0722	8
			46.0925	14
			46.1129	9
			46.1332	11
			46.1535	14
			46.1738	12
			46.1941	11
			46.2145	13
			46.2348	14
			46.2551	14
			46.2754	16
			46.2957	14
			46.3161	18
			46.3364	12
			46.3567	11
			46.377	16
			46.3974	14
			46.4177	9
			46.438	11
			46.4583	11
			46.4786	11
			46.499	9
			46.5193	6
			46.5396	8
			46.5599	17
			46.5802	12
			46.6006	21
			46.6209	19
			46.6412	13
			46.6615	15
			46.6818	14
			46.7022	9
			46.7225	13
			46.7428	12
			46.7631	13
			46.7835	19
			46.8038	14
			46.8241	24
			46.8444	16
			46.8647	18
			46.8851	16
			46.9054	18
			46.9257	17
			46.946	18
			46.9663	17
			46.9867	22
			47.007	13
			47.0273	27
			47.0476	17
			47.068	21
			47.0883	28
			47.1086	34
			47.1289	29
			47.1492	25
			47.1696	31
			47.1899	39
			47.2102	40
			47.2305	50
			47.2508	48
			47.2712	48
			47.2915	54
			47.3118	66
			47.3321	71
			47.3524	80
			47.3728	79
			47.3931	112
			47.4134	126
			47.4337	152
			47.4541	164
			47.4744	171
			47.4947	173
			47.515	223
			47.5353	192
			47.5557	225
			47.576	207
			47.5963	183
			47.6166	178
			47.6369	197
			47.6573	169
			47.6776	169
			47.6979	139
			47.7182	114
			47.7385	127
			47.7589	96
			47.7792	85
			47.7995	93
			47.8198	61
			47.8402	54
			47.8605	60
			47.8808	42
			47.9011	42
			47.9214	47
			47.9418	35
			47.9621	32
			47.9824	29
			48.0027	27
			48.023	33
			48.0434	21
			48.0637	14
			48.084	16
			48.1043	30
			48.1247	22
			48.145	19
			48.1653	24
			48.1856	26
			48.2059	18
			48.2263	12
			48.2466	11
			48.2669	19
			48.2872	11
			48.3075	17
			48.3279	13
			48.3482	20
			48.3685	12
			48.3888	15
			48.4091	11
			48.4295	6
			48.4498	11
			48.4701	9
			48.4904	13
			48.5108	17
			48.5311	12
			48.5514	12
			48.5717	16
			48.592	9
			48.6124	12
			48.6327	15
			48.653	14
			48.6733	14
			48.6936	16
			48.714	16
			48.7343	14
			48.7546	10
			48.7749	12
			48.7953	6
			48.8156	11
			48.8359	12
			48.8562	6
			48.8765	12
			48.8969	12
			48.9172	10
			48.9375	5
			48.9578	10
			48.9781	18
			48.9985	10
			49.0188	13
			49.0391	9
			49.0594	15
			49.0797	12
			49.1001	8
			49.1204	16
			49.1407	8
			49.161	13
			49.1814	17
			49.2017	12
			49.222	13
			49.2423	6
			49.2626	10
			49.283	15
			49.3033	8
			49.3236	8
			49.3439	7
			49.3642	8
			49.3846	11
			49.4049	7
			49.4252	11
			49.4455	10
			49.4659	12
			49.4862	11
			49.5065	9
			49.5268	13
			49.5471	11
			49.5675	8
			49.5878	10
			49.6081	10
			49.6284	15
			49.6487	5
			49.6691	13
			49.6894	21
			49.7097	11
			49.73	11
			49.7503	7
			49.7707	9
			49.791	13
			49.8113	10
			49.8316	13
			49.852	12
			49.8723	8
			49.8926	5
			49.9129	9
			49.9332	4
			49.9536	6
			49.9739	9
			49.9942	8
			50.0145	11
			50.0348	9
			50.0552	11
			50.0755	11
			50.0958	6
			50.1161	9
			50.1365	8
			50.1568	10
			50.1771	9
			50.1974	9
			50.2177	11
			50.2381	11
			50.2584	14
			50.2787	11
			50.299	17
			50.3194	10
			50.3397	13
			50.36	11
			50.3803	10
			50.4006	5
			50.4209	7
			50.4413	12
			50.4616	11
			50.4819	6
			50.5022	7
			50.5226	16
			50.5429	5
			50.5632	12
			50.5835	12
			50.6038	7
			50.6242	6
			50.6445	6
			50.6648	6
			50.6851	3
			50.7054	11
			50.7258	6
			50.7461	8
			50.7664	7
			50.7867	5
			50.807	10
			50.8274	7
			50.8477	8
			50.868	9
			50.8883	10
			50.9087	10
			50.929	12
			50.9493	12
			50.9696	3
			50.99	9
			51.0103	13
			51.0306	11
			51.0509	4
			51.0712	11
			51.0915	8
			51.1119	11
			51.1322	7
			51.1525	10
			51.1728	13
			51.1932	9
			51.2135	9
			51.2338	12
			51.2541	8
			51.2744	12
			51.2948	14
			51.3151	11
			51.3354	8
			51.3557	20
			51.376	12
			51.3964	14
			51.4167	8
			51.437	11
			51.4573	9
			51.4776	14
			51.498	12
			51.5183	8
			51.5386	8
			51.5589	10
			51.5793	6
			51.5996	14
			51.6199	14
			51.6402	12
			51.6606	6
			51.6809	16
			51.7012	9
			51.7215	16
			51.7418	10
			51.7621	18
			51.7825	8
			51.8028	9
			51.8231	18
			51.8434	8
			51.8638	7
			51.8841	10
			51.9044	3
			51.9247	8
			51.945	12
			51.9654	7
			51.9857	7
			52.006	9
			52.0263	8
			52.0466	7
			52.067	12
			52.0873	4
			52.1076	8
			52.1279	3
			52.1482	12
			52.1686	11
			52.1889	12
			52.2092	7
			52.2295	4
			52.2499	11
			52.2702	7
			52.2905	12
			52.3108	17
			52.3311	13
			52.3515	12
			52.3718	12
			52.3921	10
			52.4124	12
			52.4327	13
			52.4531	11
			52.4734	14
			52.4937	10
			52.514	7
			52.5344	10
			52.5547	9
			52.575	8
			52.5953	8
			52.6156	8
			52.636	17
			52.6563	8
			52.6766	4
			52.6969	8
			52.7172	11
			52.7376	12
			52.7579	11
			52.7782	6
			52.7985	6
			52.8188	11
			52.8392	8
			52.8595	9
			52.8798	8
			52.9001	10
			52.9205	11
			52.9408	9
			52.9611	9
			52.9814	11
			53.0017	11
			53.0221	10
			53.0424	6
			53.0627	11
			53.083	11
			53.1033	9
			53.1237	5
			53.144	9
			53.1643	3
			53.1846	5
			53.205	4
			53.2253	11
			53.2456	10
			53.2659	11
			53.2862	9
			53.3066	10
			53.3269	11
			53.3472	6
			53.3675	7
			53.3879	10
			53.4082	10
			53.4285	8
			53.4488	9
			53.4691	10
			53.4894	17
			53.5098	3
			53.5301	17
			53.5504	5
			53.5707	5
			53.5911	11
			53.6114	13
			53.6317	9
			53.652	11
			53.6723	12
			53.6927	10
			53.713	14
			53.7333	6
			53.7536	6
			53.7739	6
			53.7943	9
			53.8146	6
			53.8349	8
			53.8552	12
			53.8756	14
			53.8959	6
			53.9162	7
			53.9365	3
			53.9568	9
			53.9772	9
			53.9975	9
			54.0178	7
			54.0381	12
			54.0585	9
			54.0788	12
			54.0991	9
			54.1194	7
			54.1397	14
			54.16	11
			54.1804	11
			54.2007	10
			54.221	12
			54.2413	10
			54.2617	10
			54.282	8
			54.3023	11
			54.3226	9
			54.3429	7
			54.3633	5
			54.3836	10
			54.4039	13
			54.4242	11
			54.4445	19
			54.4649	12
			54.4852	10
			54.5055	21
			54.5258	8
			54.5462	13
			54.5665	3
			54.5868	9
			54.6071	14
			54.6274	14
			54.6478	16
			54.6681	9
			54.6884	12
			54.7087	14
			54.7291	9
			54.7494	7
			54.7697	13
			54.79	9
			54.8103	13
			54.8306	18
			54.851	11
			54.8713	8
			54.8916	14
			54.9119	11
			54.9323	12
			54.9526	11
			54.9729	19
			54.9932	13
			55.0135	13
			55.0339	11
			55.0542	7
			55.0745	8
			55.0948	12
			55.1151	5
			55.1355	10
			55.1558	15
			55.1761	11
			55.1964	12
			55.2168	14
			55.2371	17
			55.2574	15
			55.2777	17
			55.298	16
			55.3184	18
			55.3387	17
			55.359	12
			55.3793	17
			55.3997	15
			55.42	14
			55.4403	15
			55.4606	18
			55.4809	7
			55.5012	13
			55.5216	10
			55.5419	8
			55.5622	6
			55.5825	16
			55.6029	14
			55.6232	13
			55.6435	7
			55.6638	14
			55.6841	12
			55.7045	15
			55.7248	11
			55.7451	17
			55.7654	20
			55.7858	18
			55.8061	16
			55.8264	12
			55.8467	19
			55.867	19
			55.8874	18
			55.9077	20
			55.928	17
			55.9483	20
			55.9686	19
			55.989	13
			56.0093	19
			56.0296	25
			56.0499	20
			56.0703	34
			56.0906	27
			56.1109	33
			56.1312	40
			56.1515	24
			56.1718	44
			56.1922	44
			56.2125	43
			56.2328	40
			56.2531	48
			56.2735	70
			56.2938	63
			56.3141	65
			56.3344	77
			56.3547	92
			56.3751	89
			56.3954	91
			56.4157	133
			56.436	113
			56.4564	164
			56.4767	180
			56.497	215
			56.5173	252
			56.5376	272
			56.558	298
			56.5783	349
			56.5986	337
			56.6189	340
			56.6392	332
			56.6596	320
			56.6799	271
			56.7002	273
			56.7205	268
			56.7409	246
			56.7612	218
			56.7815	195
			56.8018	188
			56.8221	165
			56.8424	132
			56.8628	109
			56.8831	97
			56.9034	80
			56.9237	70
			56.9441	55
			56.9644	54
			56.9847	55
			57.005	54
			57.0253	48
			57.0457	38
			57.066	42
			57.0863	34
			57.1066	26
			57.127	28
			57.1473	28
			57.1676	36
			57.1879	29
			57.2082	20
			57.2286	29
			57.2489	25
			57.2692	14
			57.2895	22
			57.3098	16
			57.3302	20
			57.3505	15
			57.3708	17
			57.3911	19
			57.4115	24
			57.4318	14
			57.4521	11
			57.4724	11
			57.4927	8
			57.513	17
			57.5334	23
			57.5537	12
			57.574	19
			57.5943	8
			57.6147	15
			57.635	11
			57.6553	14
			57.6756	9
			57.6959	11
			57.7163	16
			57.7366	16
			57.7569	17
			57.7772	18
			57.7976	23
			57.8179	12
			57.8382	8
			57.8585	11
			57.8788	9
			57.8992	24
			57.9195	10
			57.9398	20
			57.9601	18
			57.9804	12
			58.0008	16
			58.0211	8
			58.0414	17
			58.0617	15
			58.0821	13
			58.1024	4
			58.1227	6
			58.143	7
			58.1633	13
			58.1837	13
			58.204	14
			58.2243	16
			58.2446	11
			58.2649	19
			58.2853	15
			58.3056	10
			58.3259	12
			58.3462	12
			58.3665	12
			58.3869	15
			58.4072	8
			58.4275	9
			58.4478	10
			58.4682	3
			58.4885	8
			58.5088	12
			58.5291	6
			58.5494	9
			58.5698	8
			58.5901	13
			58.6104	9
			58.6307	8
			58.651	15
			58.6714	5
			58.6917	13
			58.712	11
			58.7323	13
			58.7527	10
			58.773	10
			58.7933	11
			58.8136	14
			58.8339	5
			58.8543	11
			58.8746	10
			58.8949	9
			58.9152	17
			58.9355	5
			58.9559	9
			58.9762	13
			58.9965	9
			59.0168	8
			59.0371	10
			59.0575	9
			59.0778	16
			59.0981	13
			59.1184	8
			59.1388	8
			59.1591	5
			59.1794	10
			59.1997	9
			59.22	5
			59.2404	8
			59.2607	9
			59.281	8
			59.3013	10
			59.3216	11
			59.342	8
			59.3623	6
			59.3826	11
			59.4029	8
			59.4233	9
			59.4436	7
			59.4639	9
			59.4842	4
			59.5045	5
			59.5249	15
			59.5452	10
			59.5655	11
			59.5858	9
			59.6061	7
			59.6265	12
			59.6468	9
			59.6671	5
			59.6874	8
			59.7077	10
			59.7281	15
			59.7484	11
			59.7687	9
			59.789	11
			59.8094	8
			59.8297	8
			59.85	4
			59.8703	17
			59.8906	8
			59.911	12
			59.9313	9
			59.9516	12
			59.9719	9
			59.9922	8
			60.0126	11

## Sheet: Figure 3
Figure 3
CuO													NiO													NiO/CuO

## Sheet: Figure 4
Figure 4
Effect of dose concentration
dose conc. effect (60 mg/L dye conc, pH (7.5), time 2h)
	NiO-NPs	CuO-NPs	NiO/CuO-NPs
0.02	33.6364	13.1293	39.3557
0.04	47.9125	19.7279	56.7507
0.06	65.4209	30.9297	72.9412
0.08	89.4276	44.3764	89.4678
0.1	90	49.3197	92
	1.52522	1.8472	0.100996
	2.02217	1.17827	0.183682
	1.53226	3.12637	0.0840336
	2.50859	0.941248	0.218775
	5.51202	0.604639	0.0280112
	NiO	CuO	NiO/CuO
0.02	22.0231	7.5	69.0196
0.04	58.7669	11.91	87.0196
0.06	71.2139	21.38	88.0392
0.08	77.9191	29.6	91.9804
0.1	82.4663	34.39	92.8235
	2.89845	1.0827	0.463117
	1.64624	0.322786	0.412593
	0.371624	0.196078	0.645093
	0.433847	0.441938	2.0315
	0.992433	0.35781	0.701593
	NiO	CuO	NiO/CuO
0.02	18	15	76.2348
0.04	24	18	92.0783
0.06	56.8783	21	94.0891
0.08	71.6578	35	95.1282
0.1	83.7213	44	96.2213
	1.25469	0.461884	5.80888
	2.84181	0.412559	0.885253
	1.97901	0.643738	0.589946
	2.55166	2.03152	0.591949
	2.32329	0.703578	0.419658

## Sheet: Figure 5
Figure 5
Effect of dye concentration
	RB-5				RR-2				OII
	NiO	CuO	NiO/CuO		NiO	CuO	NiO/CuO		NiO	CuO	NiO/CuO
20	99.4872	71.7829	100		86.131	18.3761	86.8116		92	51.0828	87.3958
40	58.3473	39.2901	92.231		60.4587	35	93.4028		84.7563	47.7706	91.9277
60	71.2139	21.38	88.0392		65.4209	30.9297	72.9412		56.8783	21	94.0891
80	70.4456	51.3826	80.5556		57.9394	32	72.3489		43.2137	25.8419	91.5522
100	41.58	41.58	85.7287		45.8993	42	78.0782		73.4676	52.3699	87.9798
dye conc. effect (0.06g/10ml dose, pH (7.5), time 2h)
	NiO	CuO	NiO/CuO
20	99.4872	71.7829	100
40	58.3473	39.2901	92.231
60	71.2139	21.38	88.0392
80	70.4456	51.3826	80.5556
100	41.58	41.58	85.7287
S.E	0.512821	0.0775194	0
	1.08197	1.17284	1.3496
	0.371624	0.196078	0.645093
	4.80305	0.719697	0.169725
	0.367607	0.367607	0.0381782
RR-2
	NiO	CuO	NiO/CuO
20	86.131	42	86.8116
40	60.4587	35	93.4028
60	65.4209	32	72.9412
80	57.9394	30	72.3489
100	45.8993	18	78.0782
	4.21233	8.79844	0.191721
	1.3242	1.17284	0.0347222
	1.53226	3.12637	0.0840336
	1.87365	0.596695	0.062272
	3.4019	5.51873	0.416927
OII
	NiO	CuO	NiO/CuO
20	92	51.0828	87.3958
40	84.7563	47.7706	91.9277
60	56.8783	21	94.0891
80	43.2137	25.8419	91.5522
100	73.4676	52.3699	80.5
	0.34985	0.96457	0.534542
	2.96674	2.27762	0.184039
	1.97901	0.643738	0.589946
	4.37156	0.607237	0.37548
	3.86999	0.367607	0.0381782

## Sheet: Figure 6 & Table 2
Figure 6/Table 2
Reactive Red	NiO					CuO						NiO/CuO
C0	Ce	ln Ce	qe	Ce/qe	lnqe	Ce	ln Ce		qe	Ce/qe	lnqe	Ce	ln Ce	qe	Ce/qe	lnqe
40	6.03	1.79675	5.66167	1.06506	1.73372	26.1233	3.26283		2.31278	11.2952	0.83845	10.7882	2.37845	4.86863	2.21586	1.58281
60	7.97	2.07568	8.67167	0.919085	2.16006	36.1	3.58629		3.98333	9.06276	1.38212	18.983	2.94354	6.83616	2.77685	1.92223
80	10.4397	2.34561	11.5934	0.900486	2.45043	37.61	3.62727		7.065	5.32343	1.95515	27.7051	3.32162	8.71582	3.17871	2.16514
120	11.3244	2.42696	18.1126	0.625222	2.89661	43.0134	3.76151		12.8311	3.35228	2.55187	29.6622	3.38987	15.0563	1.97009	2.7118
Orange 11	NiO					CuO						NiO/CuO
C0	Ce	ln Ce	qe	Ce/qe	lnqe	Ce	ln Ce		qe	Ce/qe	lnqe	Ce	ln Ce	qe	Ce/qe	lnqe
40	7.12791	1.96402	5.47868	1.30103	1.70086	15.52	2.74213		4.08	3.80392	1.4061	0.82	-0.198451	6.53	0.125574	1.87641
60	9.40827	2.24159	8.43196	1.11579	2.13203	16.62	2.81061		7.23	2.29876	1.97824	4.61	1.52823	9.23167	0.499368	2.22264
80	27.96	3.33077	8.67333	3.22367	2.16025	29.0465	3.3689		8.49225	3.42036	2.13915	26.7209	3.28545	8.87984	3.00917	2.18378
120	28.31	3.34322	15.2817	1.85255	2.72665	30.5711	3.42005		14.9048	2.05108	2.70168	32.6124	3.48469	14.5646	2.23916	2.67859
												Freundlich
	Reactive red	Langmuir
		adsorbent	slope	Qmax	intercept	KL	R^2					adsorbent	slope	n	intercept	Kf	R^2
		NiO	0.0665	15.0376	1.472	0.0451766	0.76					NiO	1.6531	0.604924	1.26	3.52542	0.93
		CuO	0.4711	2.12269	24.083	0.0195615	0.86					CuO	3.2539	0.307324	9.99	21807.3	0.87
		NiO/CuO	0.0097	103.093	2.3239	0.00417402	0.024					NiO/CuO	2.056	0.486381	4.76	116.746	0.96
	Orange II	Langmuir
		adsorbent	slope	Qmax	intercept	KL	R^2					adsorbent	slope	n	intercept	Kf	R^2
		NiO	0.0653	15.3139	0.6838	0.0954958	0.62					NiO	0.457	2.18818	0.9369	2.55206	0.61
		CuO	0.0326	30.6748	3.64	0.00895604	0.093					CuO	1.255	0.796813	1.82	6.17186	0.71
		NiO/CuO	0.0809	12.3609	0.159	0.508805	0.86					NiO/CuO	0.156	6.41026	1.925	6.85515	0.66
		Langmuir							Freundlich
	Parameters	adsorbent	slope	Qmax	intercept	KL	R^2		slope	n	intercept	Kf	R^2
	Reactive red	NiO	0.0665	15.0376	1.472	0.0451766	0.76		1.6531	0.604924	1.26	3.52542	0.93
		CuO	0.4711	2.12269	24.083	0.0195615	0.86		3.2539	0.307324	9.99	21807.3	0.87
		NiO/CuO	0.0097	103.093	2.3239	0.00417402	0.024		2.056	0.486381	4.76	116.746	0.96
	Orange II
		NiO	0.0653	15.3139	0.6838	0.0954958	0.62		0.457	2.18818	0.9369	2.55206	0.61
		CuO	0.0326	30.6748	3.64	0.00895604	0.093		1.255	0.796813	1.82	6.17186	0.71
		NiO/CuO	0.0809	12.3609	0.159	0.508805	0.86		0.156	6.41026	1.925	6.85515	0.66

## Sheet: Figure 7 & Table 3
Figure 7/Table 3
Nio
	Reactive red						CuO		Reactive red				NiO/CuO
t (min)	Ce (ppm)	qt	ln(qe-qt)	t/qt			t (min)	Ce (ppm)	qt	ln(qe-qt)	t/qt		t (min)	Ce (ppm)	qt	ln(qe-qt)	t/qt
15	10.9437	8.17605	-0.0725739	1.83463			15	41.1635	3.13941	0.639767	4.77797		15	27.4549	5.42419	0.616722	2.76539
30	6.75782	8.8737	-1.45951	3.38078			30	40.4397	3.26005	0.574023	9.2023		30	22.7364	6.2106	0.0643151	4.83045
60	6.03396	8.99434	-2.19188	6.67086			60	37.6068	3.7322	0.264859	16.0763		60	18.983	6.83616	-0.819006	8.77685
120	5.36372	9.10605		13.1781			120	29.7873	5.03545		23.831		120	16.3378	7.27703		16.4902
Nio							CuO		Reactive red				NiO/CuO
	Orange II						t (min)	Ce (ppm)	qt	ln(qe-qt)	t/qt		t (min)	Ce (ppm)	qt	ln(qe-qt)	t/qt
t (min)	Ce (ppm)	qt	ln(qe-qt)	t/qt			15	22.2054	6.2991	0.382082	2.38129		15	4.35013	9.27498	-0.356921	1.61725
15	16.5336	7.2444	0.288973	2.07056			30	18.4393	6.92679	-0.177167	4.33101		30	1.19121	9.80146	-1.75249	3.06077
30	11.0943	8.15095	-0.847441	3.68055			60	15.5194	7.41344	-1.047	8.09341		60	0.952196	9.8413	-2.01361	6.09676
60	9.40827	8.43196	-1.91391	7.11579			120	13.4134	7.76443		15.4551		120	0.151163	9.97481		12.0303
120	8.52326	8.57946		13.9869
	PFO							PSO
	adsorbent	slope	k1	intercept	qe.cal	R^2		adsorbent	slope	qe.cal	intercept	k2	R^2
Reactive red-2	NiO	0.0439	0.101102	0.2936	1.34125	0.87		NiO	0.1083	9.23361	0.173	0.0677971	1
	CuO	0.0086	0.0198058	0.7943	2.21289	0.97		CuO	0.1764	5.66893	3.55	0.00876534	0.97
	NiO/CuO	0.0316	0.0727748	1.0584	2.88176	0.99		NiO/CuO	0.1304	7.66871	0.88	0.0193229	0.99
Orange II	adsorbent	slope	k1	intercept	qe.cal	R^2		adsorbent	slope	qe.cal	intercept	k2	R^2
	NiO	0.047	0.108241	0.822	2.27505	0.95		NiO	0.1138	8.78735	0.3106	0.0416949	0.999
	CuO	0.0314	0.0723142	0.817	2.2637	0.99		CuO	0.124	8.06452	0.5765	0.0266713	0.999
	NiO/CuO	0.0328	0.0755384	0.226	1.25358	0.71		NiO/CuO	0.099	10.101	0.1122	0.0873529	0.999
	PFO							PSO
	adsorbent	slope	k1	intercept	qe.cal	R^2		slope	qe.cal	intercept	k2	R^2
Reactive red-2	NiO	0.0439	0.101102	0.2936	1.34125	0.87		0.1083	9.23361	0.173	0.0677971	1
	CuO	0.0086	0.0198058	0.7943	2.21289	0.97		0.1764	5.66893	3.55	0.00876534	0.97
	NiO/CuO	0.0316	0.0727748	1.0584	2.88176	0.99		0.1304	7.66871	0.88	0.0193229	0.99
Orange II	adsorbent	slope	k1	intercept	qe.cal	R^2		slope	qe.cal	intercept	k2	R^2
	NiO	0.047	0.108241	0.822	2.27505	0.95		0.1138	8.78735	0.3106	0.0416949	0.999
	CuO	0.0314	0.0723142	0.817	2.2637	0.99		0.124	8.06452	0.5765	0.0266713	0.999
	NiO/CuO	0.0328	0.0755384	0.226	1.25358	0.71		0.099	10.101	0.1122	0.0873529	0.999
